# Supplementary material for: A silica coated paper substrate: development and its application in paper spray mass spectrometry for rapid analysis of pesticides in milk
Source: Royal Society of Chemistry journal article supplement (doi:10.1039/c5an01823d), 2015-01-01
Supplement: c5an01823d1.pdf [file c5an01823d1.pdf]

## Electronic Supplementary Information

### **Silica Coated Paper Substrate: Development of and Its Application in Paper Spray Mass Spectrometry for Rapid Analysis of Pesticides in Milk**

**Qian Wang, Yajun Zheng, Xiaoling Zhang, Xiaoxiao Han, Teng Wang, and Zhiping Zhang\***

School of Chemistry and Chemical Engineering, Xi'an Shiyou University, Xi'an 710065, China

\*Corresponding author.

[zhangzp0304@gmail.com](mailto:zhangzp0304@gmail.com) (Z.Z.)

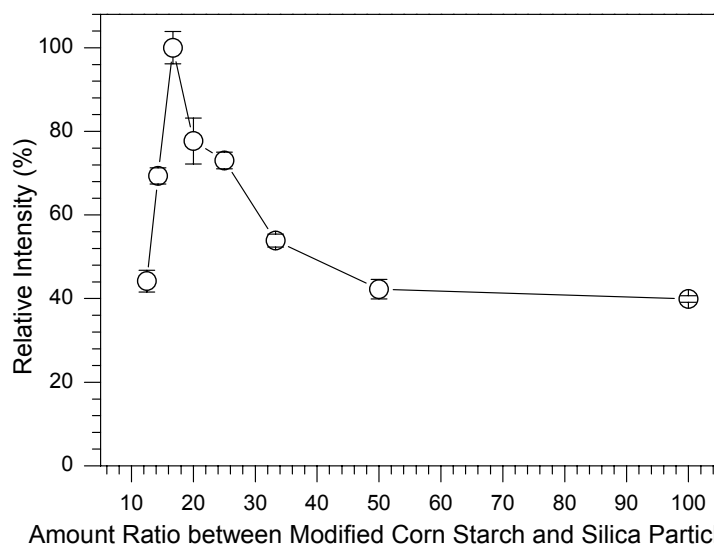

**Figure S1.** Effect of the amount ratio between the modified corn starch and silica particles on the obtained paper performance.

*Note:* The solution volume for coating was 100 mL, and the evaluation was based on the analysis of  $1 \mu\text{g mL}^{-1}$  metolachlor  $[(M + H)^+, m/z 284, \text{product ion}, m/z 252]$  in milk by using paper spray mass spectrometry (spray solvent: 9:1 methanol/water; applied voltage: 3.5 kV).

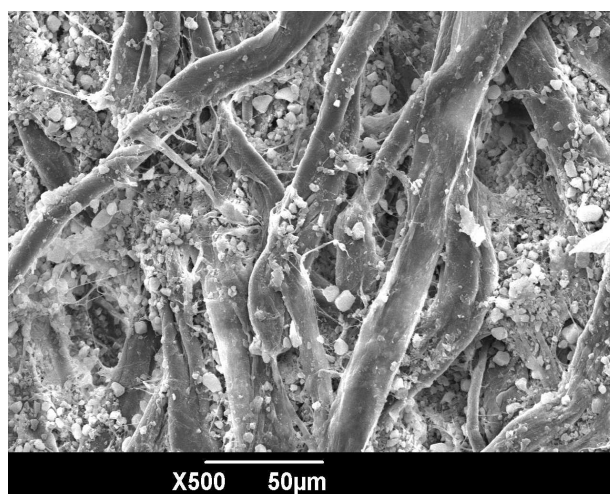

**Figure S2.** SEM image of commercial silica coated paper (grade SG81 paper).

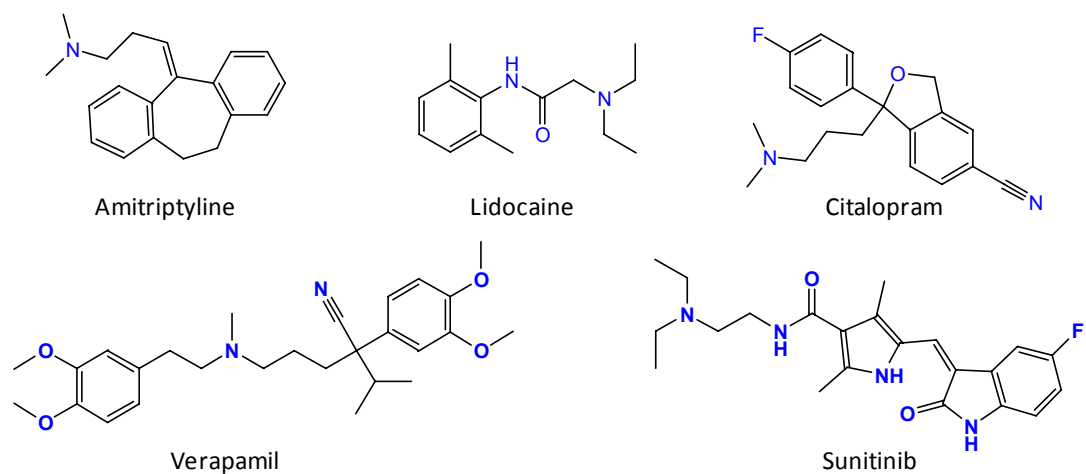

**Figure S3.** Structures of therapeutic drugs used in the reference (*Anal. Chem.* **2011**, *84*, 931-938)

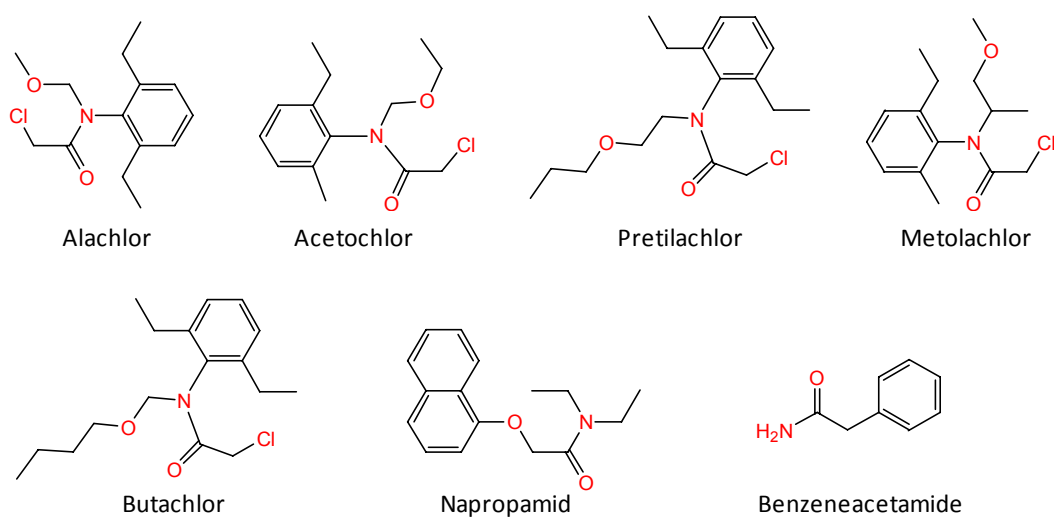

**Figure S4.** Structures of pesticides used in the present study
